# Supplementary material
Source: publisher figshare collection journal article supplement (https://tandf.figshare.com/articles/dataset/_/2075377)
Supplement: Supplementary file 1 [file 2]

| Apoplast Fluid Proteins Control |                   |      |          |                 |                    |                       |                                                                                                                                                                                                                                                                                                    |                                                                                                                                                                 |                                                       |
|---------------------------------|-------------------|------|----------|-----------------|--------------------|-----------------------|----------------------------------------------------------------------------------------------------------------------------------------------------------------------------------------------------------------------------------------------------------------------------------------------------|-----------------------------------------------------------------------------------------------------------------------------------------------------------------|-------------------------------------------------------|
| Id-No. Protein                  | Accession No.     | pI:  | MW (kDa) | Seq. Coverage % | Mascot MS/MS Score | No. of MS/MS Peptides | MS/MS Peptide sequence                                                                                                                                                                                                                                                                             | Range                                                                                                                                                           | Protein Identification                                |
| 56-8<br>60-20                   | GRMZM2G076348_P01 | 6.34 | 28.60    | 10.60           | 138.14             | 3                     | K.AGYFVVVPDFLK.G<br>R.AYVSGAASSSR.A<br>R.AVVLASDVFGYEAPLLR.Q                                                                                                                                                                                                                                       | 59-69<br>70-86<br>95-105                                                                                                                                        | Endo1,3;1,4 $\beta$ -D-glucanase                      |
| 57-20                           | GRMZM2G161335     | 5.02 | 50.00    | 2.40            | 59.81              | 1                     | R.TDLTDLVDLIK.S                                                                                                                                                                                                                                                                                    | 450-460                                                                                                                                                         | DIMBOA-UDP glucosyltransferase BX9                    |
| 52-3<br>53-17<br>59-16          | GRMZM2G016890     | 6.24 | 64.20    | 24.20           | 742.70             | 15                    | R.YGIVYVDR.N<br>R.FSISWPR.I<br>K.EGGINPDGIK.Y<br>K.YGGFLDK.S<br>K.SIVEDYTYFAK.V<br>K.VCFDNFGDKVK.N<br>R.IGLAFDVMGR.V<br>R.VPYGTSFLDK.Q<br>R.VPYGTSFLDKQAEER.S<br>R.GDYPFSMR.S<br>K.LAGSYNMLGLNYYTSR.F<br>K.NKYGNPPIYITENGIGDVDTK.E<br>K.YGNPPIYITENGIGDVDTK.E<br>K.ETPLPMEAALNDYK.R<br>K.RLDYIQR.H | 53-60<br>151-157<br>165-174<br>207-213<br>217-227<br>228-238<br>310-319<br>320-329<br>320-334<br>350-357<br>375-390<br>449-469<br>451-469<br>470-483<br>484-490 | $\beta$ -Glucosidase1<br>GDIMBOA $\beta$ -glucosidase |
| 52-11/12                        | GRMZM2G136895     | 6.65 | 38.60    | 8.0             | 153.06             | 3                     | R.AIGEVVSNEAR.A<br>R.GQETPGEDPLLTSK.Y<br>R.AVTNNLVTLMR.L                                                                                                                                                                                                                                           | 142-152<br>180-193<br>360-370                                                                                                                                   | $\beta$ -D-Xylosidase                                 |
| 51-10/11                        | GRMZM2G115065     | 5.64 | 22.90    | 4.70            | 71.57              | 1                     | R.IGEATALEVR.A                                                                                                                                                                                                                                                                                     | 135-144                                                                                                                                                         | Glycosyl hydrolase family                             |
| 52-6                            | GRMZM2G120962     | 6.08 | 63.30    | 14.20           | 413.90             | 8                     | R.FSISWSR.I<br>R.ILPNGTLEGGINPYGIK.Y<br>K.YGGFLDER.I<br>R.AHAEAVDLYNK.Y<br>R.IGLAFDVMGR.V<br>K.SAFTDQQAEQR.S<br>R.GDYPFSMR.S<br>K.DLLMIMK.N                                                                                                                                                        | 144-150<br>151-167<br>200-207<br>300-309<br>315-325<br>314-348<br>341-348<br>433-439                                                                            | Exo- $\beta$ -glucanase                               |

|                                    |               |      |       |        |        |   |                                                                                                                                          |                                                              |                                         |
|------------------------------------|---------------|------|-------|--------|--------|---|------------------------------------------------------------------------------------------------------------------------------------------|--------------------------------------------------------------|-----------------------------------------|
| 57-19                              | GRMZM2G453805 | 3.89 | 30.30 | 4.40   | 68.06  | 1 | R.FNDVQNNYSSQVK.G                                                                                                                        | 280-292                                                      | Chitinase                               |
| 57-16                              | GRMZM2G132093 | 4.95 | 14.00 | 14.80  | 120.76 | 2 | R.NQAVVDENVEK.L<br>K.VLEVYEAR.L                                                                                                          | 35-45<br>49-56                                               | Glutathione S-transferase               |
| 57-9                               | GRMZM2G116273 | 5.34 | 23.80 | 29.00  | 224.16 | 4 | R.CATALEEAGSDYEIVPINFATAEHK.S<br>R.NPFGQVPALQDGDLYLFESR.A<br>K.VLEVYEAR.L<br>K.VAALMKPSA                                                 | 18-42<br>50-69<br>142-149<br>206-214                         | Glutathione S-transferase               |
| 52-10/11<br>53-11                  | GRMZM2G135108 | 6.65 | 38.60 | 21.70  | 423.62 | 6 | R.TCPTAETIVQQTVAAAF.R.N<br>R.DSVVLSSGGLGYQVPAGR.R<br>K.AYAFLLK.S<br>K.YYVGLTNNLGLFK.S<br>K.ALVDSEFVR.S<br>K.MGQIEVLTGTQGEIR.R            | 35-52<br>132-148<br>233-239<br>269-281<br>294-301<br>317-331 | Peroxidase                              |
| 53-20/22                           | GRMZM2G044049 | 9.08 | 39.60 | 2.70   | 53.86  | 1 | R.DAVFFLSGSK.V                                                                                                                           | 176-185                                                      | Putative class III secretory peroxidase |
| 54-11                              | GRMZM2G085967 | 8.84 | 35.40 | 17.10  | 264.25 | 6 | K.AHIPHAPDVASTLLR.T<br>R.GGPDDADPSLDPLYAAK.L<br>R.GGPDDADPSLDPLYAAK.L<br>R.TFDLSYYR.G<br>R.GLFQSDAALITDAASK.A<br>R.GLFQSDAALITDAASK.A    | 46-60<br>211-227<br>244-260<br>251-258<br>265-280<br>298-313 | Peroxidase 39 precursor                 |
| 54-13                              | GRMZM2G088765 | 4.30 | 36.00 | 8.60 % | 231.71 | 3 | K.QVLVDAVQSDTR.I<br>R.IFASLIR.L<br>R.GILNSDQELK.S                                                                                        | 52-63<br>64-70<br>272-281                                    | Peroxidase                              |
| 54-16                              | GRMZM2G048474 | 6.20 | 38.10 | 5.20   | 113.56 | 1 | K.EAPVNIGLAAFDVL EEIK.A                                                                                                                  | 96-113                                                       | Putative class III secretory peroxidase |
| 54-17<br>56-7<br>57-17<br>59-14/15 | GRMZM2G108207 | 6.25 | 37.50 | 8.70   | 107.52 | 2 | R.DAVVASGGPFFEVLGR.R<br>R.FALNQAAFFDQFAR.S                                                                                               | 144-160<br>293-306                                           | Anionic Peroxidase                      |
| 52-16/17<br>54-19/21               | GRMZM2G168073 | 5.50 | 27.40 | 6.50   | 57.09  | 1 | R.GFEVIDAAK.A<br>R.VLFTSDASLLTSPATAK.L                                                                                                   | 37-45<br>200-216                                             | Putative class III secretory peroxidase |
| 56-4/5                             | GRMZM2G133475 | 9.70 | 33.50 | 24.70  | 275.57 | 6 | R.SGVNSAVRQEPR.V<br>R.GFVVVNSIK.A<br>R.DGVVALGGPSWTVLLGR.R<br>R.DGVVALGGPSWTVLLGRR.D<br>R.DSTASFPQTSDLPPPTSSLR.Q<br>R.SFASSTSAFNATAMVK.M | 49-60<br>103-111<br>134-150<br>134-151<br>152-172<br>279-297 | Peroxidase 66 precursor                 |

|                     |                   |           |       |       |        |   |                                                                                                                                                                                                         |                                                                                               |                                                              |
|---------------------|-------------------|-----------|-------|-------|--------|---|---------------------------------------------------------------------------------------------------------------------------------------------------------------------------------------------------------|-----------------------------------------------------------------------------------------------|--------------------------------------------------------------|
| 56-7                | GRMZM2G108219     | 5.61      | 38.70 | 8.80  | 190.37 | 3 | R.DAVVASGGPFFEVPLGR.R<br>R.DAVVASGGPFFEVPLGRR.D<br>R.FALNQAFFDQFAR.S                                                                                                                                    | 147-163<br>147-164<br>299-312                                                                 | Peroxidase precursor                                         |
| 56-10               | GRMZM2G427815     | 6.22      | 33.20 | 13.80 | 110.12 | 3 | K.SAVNAAVQKENR.M<br>R.DSVVALGGPSWTVPLGR.R<br>K.MGNLSPLTGSQQQIR.L                                                                                                                                        | 42-53<br>131-147<br>299-313                                                                   | Peroxidase                                                   |
| 58-13               | GRMZM2G126261     | 5.36      | 26.40 | 6.70  | 67.71  | 1 | R.DGVVALGGPSWTVLLGR.R                                                                                                                                                                                   | 67-83                                                                                         | Peroxidase 66 precursor                                      |
| 54-9                | GRMZM2G103342     | 9.66      | 38.00 | 19.60 | 330.78 | 5 | R.VVSCADIVALAAR.E<br>R.DGLAPASNAAVLAALPPPTSK.V<br>K.VPTLLSFLAK.I<br>R.LFPTQDPTLNK.F<br>R.TPNAFDNKYYVDLLNR.E                                                                                             | 132-144<br>163-183<br>184-193<br>222-232<br>257-272                                           | Peroxidase 12                                                |
| 56-12/13<br>58-9/11 | GRMZM2G108153     | 5.25      | 35.50 | 8.60  | 117.82 | 2 | R.SSVDAALQQNVR.L<br>R.DAVSLSGGPSFTVPLGR.L<br>R.CSSFGDVAGPATDDVTR.C                                                                                                                                      | 58-69<br>141-157<br>211-227                                                                   | Peroxidase                                                   |
| 54-6/7              | GRMZM2G025441     | 10.4<br>6 | 33.40 | 24.00 | 433.63 | 5 | K.AAVTAAVAQEAR.M<br>R.DSVVALGGPSWR.V<br>R.TDLVALSGAHTIGLAQCK.N<br>R.GLLHSDQQLFNGGATDGLVR.T<br>R.MGNISPLTGTQQQIR.R                                                                                       | 45-66<br>132-143<br>185-202<br>261-280<br>300-314                                             | Peroxidase                                                   |
| 54-14/15            | AC196475.3_FGP004 | 5.41      | 39.50 | 6.00  | 122.09 | 2 | K.NAIELGLLEVLQK.E<br>R.LLASVDVVR.C                                                                                                                                                                      | 35-47<br>85-93                                                                                | O-Methyltransferase                                          |
| 51-1/2<br>54-1/2    | GRMZM2G149751-P01 | 5.45      | 84.40 | 14.90 | 553.31 | 9 | K.FALESFWDGK.S<br>R.GTQTLGLVTSAGFPAGK.Y<br>K.YLFAGVVDGR.N<br>K.SWLAFAAQK.V<br>K.VVEVDALAK.A<br>K.ALAGQKDEAYFAANAAAQASR.K<br>K.KLNLPIPTTTIGSFQTVELR.R<br>K.LNLPIPTTTIGSFQTVELR.R<br>K.YGAGIGPGVYDIHSPR.I | 19-28<br>271-287<br>288-297<br>350-358<br>359-367<br>368-388<br>427-448<br>428-448<br>690-705 | Putative homocysteine methyltransferase, methionine synthase |
| 52-9                | GRMZM2G149751-P02 | 8.89      | 60.00 | 10.30 | 355.07 | 5 | R.QNLEPLFEQYINNLR.R<br>K.ADTLTDEINFLR.A<br>R.NLDLDSIIAEVK.A<br>K.AQYEEIAQR.S<br>K.YEELQITAGR.H                                                                                                          | 208-222<br>288-299<br>327-338<br>339-347<br>360-369                                           | Putative homocysteine methyltransferase, methionine synthase |

| 54-12                                  | GRMZM2G149751-P05 | 5.39 | 85.90       | 6.10                  | 234.02                | 3                           | K.TLTSLSSVTAYGFDLVR.G<br>K.YLFAGVVDGR.N<br>K.LNLPILPTTTIGSFQTVELR.R                                                                                                      | 254-270<br>288-297<br>428-448                                                    | Putative<br>homocysteine<br>methyltransferase,<br>methionine synthase |
|----------------------------------------|-------------------|------|-------------|-----------------------|-----------------------|-----------------------------|--------------------------------------------------------------------------------------------------------------------------------------------------------------------------|----------------------------------------------------------------------------------|-----------------------------------------------------------------------|
| 51-4                                   | GRMZM2G165747     | 5.81 | 84.40       | 11.50                 | 382.00                | 7                           | K.FALESFWDGK.S<br>K.YLFAGVVDGR.N<br>K.SWLAFAAQK.V<br>K.ALAGQKDEAYFAANAAAQASR.R<br>K.KLNLPVLPTTTIGSFQTVELR.R<br>K.LNLPVLPTTTIGSFQTVELR.R<br>K.YGAGIGPGVYDIHSPR            | 19-28<br>287-296<br>349-357<br>367-387<br>426-447<br>427-447<br>689-704          | Putative<br>homocysteine<br>methyltransferase,<br>methionine synthase |
| 53-8                                   | GRMZM2G067225     | 6.60 | 53.00       | 22.40                 | 596.09                | 8                           | K.DVPGSYGLPLVGAVR.D<br>R.DRLDFYYFQQQDK.Y<br>R.SNFSSLLATVEAELAK.G<br>K.QALDTAEGLGLSR.E<br>K.VLFPGLLANVASGGEK.L<br>K.VTLAAVER.M<br>R.VFGDTAGDFVPDR.F<br>K.ELLGTSVIFTGVTK.A | 14-28<br>29-41<br>146-161<br>253-265<br>286-301<br>321-328<br>387-399<br>461-474 | Cytochrome P450                                                       |
| Apoplast Fluid Proteins BOA            |                   |      |             |                       |                       |                             |                                                                                                                                                                          |                                                                                  |                                                                       |
| Protein-Id<br>Spot No.-<br>Protein No. | Accession No.     | pI:  | MW<br>(kDa) | Seq.<br>Coverage<br>% | Mascot MS/MS<br>Score | No. of<br>MS/MS<br>Peptides | MS/MS Peptide sequence                                                                                                                                                   | Range                                                                            | Protein<br>Identification                                             |
| 68-6<br>69-16<br>72-11                 | GRMZM2G076348     | 6.34 | 28.60       | 15.20                 | 281.12                | 4                           | R.AYVSGAASSSR.A<br>R.AVVLASDVFGYEAPLLR.Q<br>K.AGYFVVVPDFLK.G<br>K.TAETALAYMVSWFNK.H                                                                                      | 59-69<br>70-86<br>95-106<br>247-261                                              | Endo1,3;1,4 β-D-<br>glucanase                                         |
| 65-12                                  | GRMZM2G111143     | 5.72 | 40.60       | 5.80                  | 86.89                 | 2                           | R.TFETYVFSLFDENQKPGPVAER.N<br>R.NFGIFNTDLTPK.Y                                                                                                                           | 312-332<br>334-345                                                               | Glucan endo-1,3-<br>beta-glucosidase<br>precursor                     |

|                  |               |       |       |       |        |   |                                                                                                                                                                  |                                                                                                 |                                             |
|------------------|---------------|-------|-------|-------|--------|---|------------------------------------------------------------------------------------------------------------------------------------------------------------------|-------------------------------------------------------------------------------------------------|---------------------------------------------|
| 64-5<br>65-10    | GRMZM2G016890 | 6.25  | 64.20 | 14.70 | 490.68 | 8 | R.FSISWPR.I<br>K.EGGINPDGIK.Y<br>K.YGGFLDK.S<br>K.SIVEDYTYFAK.V<br>R.VPYGTSFLDK.Q<br>R.GDYPFSMR.S<br>R.IGLAFDVMGR.V<br>K.LAGSYNMLGLNYYTSR.F<br>K.ETPLPMEALNDYK.R | 151-157<br>165-174<br>207-213<br>217-227<br>310-319<br>320-329<br>350-357<br>375-390<br>470-483 | β-Glucosidase1<br>GDIMBOA β-<br>glucosidase |
| 64-14            | GRMZM2G017186 | 9.96  | 32.60 | 8.7   | 94.95  | 2 | R.DYYIGSLLSGGGSVPR.K<br>R.IGAATALEVR.A                                                                                                                           | 76-91<br>140-149                                                                                | Exohydrolase II                             |
| 64-7<br>65-13    | GRMZM2G120962 | 6.08  | 63.30 | 9.0   | 234.34 | 5 | R.FSISWSR.I<br>R.ILPNGTLEGGINPYGIK.Y<br>R.GDYPFSMR.S<br>K.YGGFLDER.I<br>R.IGLAFDVMGR.V                                                                           | 144-150<br>151-167<br>200-207<br>300-309<br>341-348                                             | Exo-β -glucanase                            |
| 64-11            | GRMZM2G136895 | 5.55  | 47.50 | 8.0   | 148.94 | 3 | R.AIGEVVSNEAR.A<br>R.GQETPGEDPLLTSK.Y<br>R.AVTNNLVTLMR.L                                                                                                         | 142-152<br>180-193<br>360-370                                                                   | β-D-Gylosidase                              |
| 69-16/17         | GRMZM2G453805 | 3.89  | 30.30 | 4.4   | 101.09 | 1 | R.FNDVQNNYSSQVK.G                                                                                                                                                | 280-292                                                                                         | Chitinase glucosyl<br>hydrolase             |
| 69-10/11         | GRMZM2G116273 | 5.34  | 23.80 | 17.30 | 189.34 | 3 | R.NPFGQVPALQDGDLYLFESR.A<br>K.VLEVYEAR.L<br>K.VAALMKPSA.                                                                                                         | 50-69<br>142-149<br>206-214                                                                     | Glutathione S-<br>transferase               |
| 70-12/13<br>69-7 | GRMZM2G132093 | 5.73  | 24.60 | 20.60 | 259.98 | 4 | K.VYGWAISPFVSR.A<br>K.VPVLEDGDLTLFESR.A<br>R.NQAVVDENVEK.L<br>K.VLEVYEAR.L                                                                                       | 8-19<br>57-71<br>130-140<br>144-151                                                             | Glutathione S-<br>transferase               |
| 65-11            | GRMZM2G135108 | 6.65  | 38.60 | 13.90 | 212.23 | 4 | R.TCPTAETIVQQTVAAAF.R.N<br>R.DSVVLSGGLGYQVPAGR.R<br>K.AYAFLLK.S<br>K.ALVDSEFVR.S                                                                                 | 35-52<br>132-148<br>233-239<br>294-301                                                          | Peroxidase                                  |
| 67-5/6           | GRMZM2G025441 | 10.46 | 33.40 | 16.5  | 214.5  | 4 | K.AAVTAAVAQEAR.M<br>R.GFGVVDNIK.A<br>R.DSVVALGGPSWR.V<br>R.GLLHSDQQLFNGGATDGLVR.T                                                                                | 45-56<br>101-109<br>132-143<br>261-280                                                          | Peroxidase                                  |
| 66-11/12         | GRMZM2G085967 | 7.71  | 30.30 | 17.90 | 177.76 | 3 | R.DSVGVIGPFWVSVPTGR.R<br>R.GGPDDADPSLDPLYAAK.L<br>R.GLFQSDAALITDAASK.A                                                                                           | 80-96<br>163-179<br>217-232                                                                     | Peroxidase                                  |

|                          |                   |      |       |       |        |   |                                                                                                                                                            |                                                                         |                                 |
|--------------------------|-------------------|------|-------|-------|--------|---|------------------------------------------------------------------------------------------------------------------------------------------------------------|-------------------------------------------------------------------------|---------------------------------|
| 67-10<br>68-10           | GRMZM2G108207     | 6.25 | 37.50 | 8.70  | 191.78 | 2 | R.DAVVASGGPFFEVLGR.R<br>R.FALNQAAFFDQFAR.S                                                                                                                 | 144-160<br>293-306                                                      | Peroxidase                      |
| 67-11<br>70-15/16        | GRMZM2G126261     | 5.41 | 39.50 | 6.70  | 90.57  | 1 | R.DGVVALGGPSWTVLLGR.R                                                                                                                                      | 67-83                                                                   | Peroxidase                      |
| 68-14/15                 | GRMZM2G427815     | 6.22 | 33.40 | 5.60  | 83.02  | 2 | K.SAVNAAVQK.E<br>R.GFDVIANIK.A                                                                                                                             | 42-50<br>100-108                                                        | Peroxidase                      |
| 66-12/13                 | GRMZM2G088765     | 4.30 | 36.00 | 7.70  | 123.13 | 3 | R.IFASLIR.L<br>R.GFGVVDAK.A<br>R.GILNSDQELK.S                                                                                                              | 64-70<br>108-116<br>272-281                                             | Peroxidase                      |
| 67-9                     | AC197758.3_FGP004 | 6.87 | 34.70 | 11.40 | 146.44 | 1 | R.GFEVIDAVK.S<br>R.DSVVILGGPTWDVK.V<br>K.DMVALSGAHTIGQAR.C                                                                                                 | 112-120<br>143-156<br>197-211                                           | Peroxidase                      |
| 67-11<br>68-8<br>71-9    | GRMZM2G133475     | 9.70 | 33.50 | 12.80 | 193.51 | 3 | R.GFVVVNSIK.A<br>R.DGVVALGGPSWTVLLGR.R<br>K.MGNLSPQTGTQGQIR.R                                                                                              | 103-111<br>134-150<br>298-312                                           | Peroxidase                      |
| 67-14/17                 | GRMZM2G070603     | 9.11 | 35.30 | 4.80  | 60.90  | 1 | R.GLFQSDAALLADATTR.E                                                                                                                                       | 270-285                                                                 | Peroxidase                      |
| 68-12                    | GRMZM2G405459     | 9.77 | 33.10 | 14.00 | 132.06 | 2 | R.DGVNLLSGPTWAVQLGR.R<br>R.TASQSAANSNLPSPSSSAAALVSAFA<br>SK.G                                                                                              | 130-146<br>151-178                                                      | Peroxidase                      |
| 66-8/9                   | GRMZM2G103342     | 9.66 | 38.00 | 14.10 | 304.56 | 5 | R.YPPLAPGLSFDFYK.K<br>R.EFLASAVR.Q<br>R.QNVGLAAALIR.L<br>K.VPTLLSFLAK.I<br>K.YYVDLLNR.E                                                                    | 31-44<br>56-63<br>64-74<br>184-193<br>265-272                           | Peroxidase                      |
| 68-13/14                 | GRMZM2G108153     | 5.25 | 35.50 | 8.60  | 104.29 | 2 | R.SSVDAALQQNVR.L<br>R.DAVSLSGGPSFTVPLGR.L                                                                                                                  | 58-69<br>141-157                                                        | Peroxidase                      |
| 66-14/16<br>67-12/14     | AC196475.3_FGP004 | 5.41 | 39.50 | 3.60  | 90.57  | 1 | K.NAIELGLLEVQLK.E                                                                                                                                          | 2                                                                       | O-Methyltransferase             |
| 63-3<br>64-7/8<br>66-7/9 | GRMZM2G149751-P01 | 5.45 | 84.40 | 13.30 | 433.25 | 7 | K.FALESFWDGK.S<br>K.WFDTNYHFIVPELGPNTK.F<br>R.GTQTLGLVTSAGFPAGK.Y<br>K.YLFAGVVDGR.N<br>K.LNLPILPTTTIGSFPQTVELR.R<br>K.YGAGIGPGVYDIHSPR.I<br>R.IPSAEEIADR.I | 19-28<br>112-129<br>271-287<br>288-297<br>428-448<br>690-705<br>706-715 | Putative methionine<br>synthase |
| 67-10                    | GRMZM2G149751-P02 | 5.45 | 49.70 | 6.31  | 151.09 | 3 | K.FALESFWDGK.S<br>R.GTQTLGLVTSAGFPAGK.Y<br>K.YLFAGVVDGR.N                                                                                                  | 19-28<br>271-287<br>288-297                                             | Putative methionine<br>synthase |

| 63-2                                     | GRMZM2G149751-P05 | 5.39 | 85.90    | 17.30           | 516.71             | 9                     | K.FALESFWDGK.S<br>K.WFDTNYHFIVPELGPNTK.F<br>R.GTQTLGLVTSAGFPAGK.Y<br>K.YLFAGVVDGR.N<br>K.VVEVDALAK.A<br>K.ALAGQKDEAYFAANAAQASR.K<br>K.LNLPILPTTTIGSFPQTVELR.R<br>K.YGAGIGPGVYDIHSPR.I<br>R.IPSAEEIADRIDK.M | 19-28<br>112-129<br>271-287<br>288-297<br>359-367<br>368-388<br>428-448<br>690-705<br>706-718 | Putative methionine synthase     |
|------------------------------------------|-------------------|------|----------|-----------------|--------------------|-----------------------|------------------------------------------------------------------------------------------------------------------------------------------------------------------------------------------------------------|-----------------------------------------------------------------------------------------------|----------------------------------|
| 63-6                                     | GRMZM2G112149     | 5.78 | 84.60    | 7.5             | 234.83             | 4                     | K.FALESFWDGK.S<br>K.YLFAGVVDGR.N<br>K.LNLPVLPTTTIGSFPQTVELR.R<br>K.YGAGIGPGVYDIHSPR.I                                                                                                                      | 19-28<br>287-296<br>427-447<br>689-704                                                        | Methionine synthase              |
| 65-9                                     | GRMZM2G067225     | 6.60 | 53.00    | 18.00           | 342.00             | 6                     | K.DVPGSYGLPLVGAVR.D<br>R.SNFSSLLATVEAELAK.G<br>K.QALDTAEGLGLSR.E<br>K.VLFPGLLANVASGGEK.L<br>K.DLLVESHDAVFQVR.K<br>R.VFGDTAGDFVPDR.F                                                                        | 14-28<br>146-161<br>253-265<br>286-301<br>356-369<br>387-399                                  | Cytochrom P450                   |
|                                          |                   |      |          |                 |                    |                       |                                                                                                                                                                                                            |                                                                                               |                                  |
| Cell wall salt extract proteins, control |                   |      |          |                 |                    |                       |                                                                                                                                                                                                            |                                                                                               |                                  |
| Id-No. Protein                           | Accession No.     | pI:  | MW (kDa) | Seq. Coverage % | Mascot MS/MS Score | No. of MS/MS Peptides | MS/MS Peptide sequence                                                                                                                                                                                     | Range                                                                                         | Protein Identification           |
| 75-11/14                                 | GRMZM2G115065     | 5.64 | 22.90    | 4.7             | 77.61              | 1                     | R.IGEATALEVR.A                                                                                                                                                                                             | 135-144                                                                                       | Glycosyl hydrolase               |
| 81-12<br>80-11<br>79-30<br>76-18         | GRMZM2G076348     | 6.34 | 28.60    | 4.5             | 60.02              | 6                     | R.AYVSGAASSSR.A<br>R.AVVLASDVFGYEAPLLR.Q<br>K.AGYFVVVPDFLK.G<br>K.AVCLSHPYSVTADDMK.E<br>K.AAEDAKPLFAALK.K<br>K.IFQGVVEHGFACR.Y                                                                             | 59-69<br>70-26<br>95-106<br>128-140<br>169-184<br>225-236                                     | Endo1,3;1,4 β-D-glucanase        |
| 80-28                                    | GRMZM2G004699     | 6.20 | 34.10    | 5.7             | 92.70              | 2                     | R.IYLWFDPTK.E<br>R.DLDAAQYR.R                                                                                                                                                                              | 140-148<br>255-262                                                                            | Xyloglucan-endo-transglycosylase |

|                             |               |      |       |       |        |    |                                                                                                                                                                                                                      |                                                                                                                   |                             |
|-----------------------------|---------------|------|-------|-------|--------|----|----------------------------------------------------------------------------------------------------------------------------------------------------------------------------------------------------------------------|-------------------------------------------------------------------------------------------------------------------|-----------------------------|
| 81-34                       | GRMZM2G409642 | 8.65 | 45.30 | 3.2   | 65.88  | 1  | R.ILTTNLWSAELSK.L                                                                                                                                                                                                    | 134-146                                                                                                           | UPD-glucose-6-dehydrogenase |
| 77-7<br>78-26               | GRMZM2G118003 | 9.37 | 56.40 | 25.70 | 655.59 | 11 | K.GANWLGLSR.A<br>K.GFVFGTATSAYQVEGAASTNGR.G<br>K.SLNFDAYR.F<br>R.FSISWSR.I<br>K.YGGWLSAK.M<br>K.MADLFTDYADFCFK.T<br>R.IVALLGYDTGSNPPQR.C<br>K.GSADYIGINEYTSSYMK.G<br>R.SYIGQLK.K<br>K.FGIVYVDFNTLER.H<br>K.ASAYWFR.D | 28-37<br>43-64<br>104-111<br>112-118<br>166-173<br>174-187<br>204-219<br>330-346<br>437-443<br>474-486<br>490-496 | β-Glucosidase               |
| 76-9/12                     | GRMZM2G147687 | 7.12 | 66.90 | 9.30  | 299.64 | 4  | R.IGEATALEVR.A<br>R.GFVISDWEGIDR.I<br>R.YTEFIDDLTTQVQNK.V<br>K.FTMGLFENPYPDSSLAGELGK.Q                                                                                                                               | 149-158<br>301-312<br>342-356<br>375-395                                                                          | Glycosyl hydrolase          |
| 82-6<br>83-25/27            | GRMZM2G175134 | 9.01 | 21.40 | 22.90 | 261.28 | 4  | R.DLFGPGALER.A<br>K.LLDIYEQR.L<br>R.LGEEAFLAGGK.F<br>K.FTLADLSHLPNADR.L                                                                                                                                              | 27-36<br>110-117<br>118-128<br>129-142                                                                            | Glutathione S-transferase   |
| 82-12<br>83-17/26           | GRMZM2G096247 | 7.87 | 25.80 | 15    | 195.18 | 3  | R.YVCTQFPNDGNK.S<br>K.SLYGSGALER.A<br>K.QVLDVYDEILSR.N                                                                                                                                                               | 75-86<br>87-96<br>148-159                                                                                         | Glutathione S-transferase   |
| 82-20                       | GRMZM2G126763 | 7.86 | 20.20 | 12.40 | 98.20  | 2  | K.SLYGSGALER.A<br>K.QVLDVYDEILSK.N                                                                                                                                                                                   | 38-47<br>99-110                                                                                                   | Glutathione S-transferase   |
| 82-10/11                    | GRMZM2G126781 | 9.01 | 21.40 | 17.60 | 207.40 | 4  | K.LRDPTGQVTFK.H<br>R.YLCTQFPDDGYK.K<br>R.YLCTQFPDDGYKK.L<br>K.LYGTGSLER.A                                                                                                                                            | 50-60<br>75-86<br>75-87<br>88-96                                                                                  | Glutathione S-transferase   |
| 76-17<br>77-18/19<br>80-1/2 | GRMZM2G108207 | 6.25 | 37.50 | 31.30 | 645.21 | 9  | R.DIGIAAGLIR.I<br>K.VSCADITTLATR.D<br>R.DAVVASGGPFFEVLGR.R<br>R.SLDTADLVALSGAHTVGR.G<br>K.DASAAQVLDVR.T<br>R.TPNAFDNK.Y<br>R.TPNAFDNKYYFDLIAK.Q<br>K.SDQGLINDQTTK.R<br>R.FALNQAAFFDQFAR.S                            | 68-77<br>132-143<br>144-160<br>193-210<br>244-254<br>255-262<br>255-270<br>276-287<br>293-306                     | Peroxidase                  |



|                                                       |               |       |       |       |        |   |                                                                                                                                                                                                                     |                                                                                                 |            |
|-------------------------------------------------------|---------------|-------|-------|-------|--------|---|---------------------------------------------------------------------------------------------------------------------------------------------------------------------------------------------------------------------|-------------------------------------------------------------------------------------------------|------------|
| 77-19/20<br>78-30/31                                  | GRMZM2G135108 | 6.65  | 38.60 | 5     | 80.05  | 1 | R.TCPTAETIVQQTVAAAF.R.N                                                                                                                                                                                             | 35-52                                                                                           | Peroxidase |
| 77-20/22                                              | GRMZM2G044049 | 9.08  | 39.60 | 3.5   | 65.62  | 1 | K.SDAALLTSTETAR.M                                                                                                                                                                                                   | 312-324                                                                                         | Peroxidase |
| 77-21/25                                              | GRMZM2G168073 | 5.50  | 27.40 | 3.5   | 55.64  | 1 | R.GFEVIDAAK.A                                                                                                                                                                                                       | 37-45                                                                                           | Peroxidase |
| 78-4<br>79-25/26                                      | GRMZM2G394500 | 8.09  | 38.00 | 40.40 | 700.38 | 9 | K.TAPINIGLAAFEVIDEIK.A<br>R.CPGTVSCADIVVYAAR.D<br>R.DASSLLSNGHVHFAAPAGR.L<br>R.DLPDSTFTVSELIR.N<br>R.LSAPPAQIVPAYR.N<br>K.CAAAAGGADDPVVANNVRDEDPR.A<br>R.AVAAAFPSFLGK.L<br>R.DFLDNSYYHNNLAR.I<br>R.IVTFNSDWQLLTEK.E | 100-117<br>124-139<br>140-158<br>172-185<br>218-230<br>237-259<br>260-271<br>277-290<br>291-304 | Peroxidase |
| 78-5<br>79-13                                         | GRMZM2G085967 | 8.84  | 35.40 | 28.40 | 545.91 | 7 | K.EGFYDYSCPQAEK.I<br>K.AHIPHAPDVASTLLR.T<br>R.GFGFIDR.I<br>K.ECPGVVSCADIVALAAR.D<br>R.DSVGVIGGPFWSVPTGR.R<br>R.TFDLSYYR.G<br>R.GLFQSDAALITDAASK.A                                                                   | 26-38<br>46-60<br>97-103<br>111-127<br>128-144<br>251-258<br>265-280                            | Peroxidase |
| 78-21/22<br>80-19/21<br>81-25/26<br>82-21/22<br>84-29 | GRMZM2G055487 | 6.80  | 30.80 | 10.90 | 163.25 | 2 | R.ALSVAPSLAGPLLR.M<br>R.GFGFIER.V<br>K.GPFWAVPLGR.R<br>R.TFDLGYYANVAK.R                                                                                                                                             | 4-17<br>54-60<br>92-101<br>208-219                                                              | Peroxidase |
| 79-1                                                  | GRMZM2G025441 | 10.46 | 33.40 | 37.10 | 747.02 | 8 | K.AAVTAAVAQEAR.M<br>R.GFGVVDNIK.A<br>K.AQVEAVCPGVVSCADILAVAAR.D<br>R.DSVVALGGPSWR.V<br>R.TDLVALSGAHTIGLAQCK.N<br>R.GLLHSDQQLFNGGATDGLVR.T<br>R.RFSGDFAAAMIR.M<br>R.FSGDFAAAMIR.M<br>R.MGNISPLTGTQGQIR.R             | 45-56<br>101-109<br>110-131<br>132-143<br>185-202<br>261-280<br>288-299<br>289-299<br>300-299   | Peroxidase |

|                      |               |      |       |       |        |    |                                                                                                                                                                                                                              |                                                                                                                   |            |
|----------------------|---------------|------|-------|-------|--------|----|------------------------------------------------------------------------------------------------------------------------------------------------------------------------------------------------------------------------------|-------------------------------------------------------------------------------------------------------------------|------------|
| 75-6<br>78-3<br>79-2 | GRMZM2G103342 | 9.66 | 38.00 | 33.10 | 739.41 | 11 | R.YPPLAPGLSFDFYK.K<br>R.QNVGLAAALIR.L<br>R.VVSCADIVALAAR.E<br>R.DGLAPASNAAVLAALPPPTSK.V<br>K.VPTLLSFLAK.I<br>K.FFAGQLYR.T<br>R.TPNAFDNK.Y<br>R.TPNAFDNKYYVDLLNR.E<br>K.YYVDLLNR.E<br>K.MGQVNVLTGSQGQVR.A<br>R.ESVALGGGPAYK.L | 31-44<br>64-74<br>132-144<br>145-156<br>163-183<br>184-193<br>233-240<br>257-264<br>257-272<br>265-272<br>313-327 | Peroxidase |
| 91-16<br>92-2        | GRMZM2G108219 | 5.61 | 38.70 | 33.50 | 655.90 | 9  | R.WHVAEALR.R<br>R.DIGIAAGLIR.I<br>R.AAVHAVCGPTVSCADITTLATR.D<br>R.DAVVASGGPFFEVPLGR.R<br>R.SLDKADLVALSGAHTVGR.G<br>K.CASDPSGNVVTQVLDVR.T<br>R.TPNAFDNK.Y<br>R.TPNAFDNKYYFDLIAK.Q<br>R.FALNQAAFFDQFAR.S                       | 62-69<br>71-80<br>125-146<br>147-163<br>196-213<br>244-260<br>261-268<br>261-276<br>299-312                       | Peroxidase |
| 79-4<br>80-12/13     | GRMZM2G089982 | 9.59 | 35.70 | 29.70 | 483.81 | 7  | K.EIVQSIVAQAVAK.E<br>R.GFEVIDQIK.A<br>K.AALEAACPGTVSCADIVALAAR.D<br>R.DSTALVGGPYWDVPLGR.R<br>R.SGGDNNLFPLDFITPAK.F<br>K.GLLSSDEILLTK.S<br>K.SAETAALVK.A                                                                      | 44-56<br>104-112<br>113-134<br>135-151<br>239-255<br>269-280<br>281-289                                           | Peroxidase |
| 79-8                 | GRMZM2G410175 | 6.20 | 35.00 | 22.30 | 392.69 | 7  | R.FYGGSCPSVEDVVR.K<br>R.ALSVAPSLAGPLLR.M<br>R.GFGFIER.V<br>R.DAVWLSK.G<br>K.GPFWAVPLGR.R<br>R.DTDPELDR.A<br>R.TFDLGYANVAK.R                                                                                                  | 25-38<br>44-57<br>94-100<br>125-131<br>132-141<br>211-218<br>247-258                                              | Peroxidase |

| 80-4/5                               | GRMZM2G108123     | 9.48 | 36.60    | 39.50           | 538.41             | 10                    | R.TAVQAALR.R<br>R.EIALAAGLLR.I<br>R.IFFHDCFPQGCDASVLLK.G<br>R.ALQLIDDIR.A<br>K.VHAACGPTVSCADVTALATR.A<br>R.AAVVASGGPSYPVPLGQR.D<br>R.DVADLVALSGAHTVGR.A<br>R.ADSQEDDFAR.Q<br>R.LQQLDVVTPDADFNVYYK.N<br>R.DPTTAPIVR.C | 51-58<br>60-69<br>70-87<br>105-113<br>136-153<br>136-153<br>189-204<br>214-223<br>236-253<br>271-279 | Peroxidase                   |
|--------------------------------------|-------------------|------|----------|-----------------|--------------------|-----------------------|----------------------------------------------------------------------------------------------------------------------------------------------------------------------------------------------------------------------|------------------------------------------------------------------------------------------------------|------------------------------|
| 80-8/9                               | GRMZM2G023840     | 9.48 | 36.60    | 34.00           | 456.97             | 8                     | R.LHFHDCFVK.G<br>R.GFEVIDEIK.A<br>K.AALEAACPGTVSCADILALAAR.D<br>K.LQGLDIVDLVALLGSHTIGDSR.C<br>R.SGGDQNLFFLDPVTPFK.F<br>K.FDNQYYK.N<br>K.LYAANQDIFFQHFR.S<br>K.MGNISPLTGANGEIR.K                                      | 76-84<br>113-121<br>122-143<br>191-212<br>248-264<br>265-271<br>299-313<br>318-332                   | Peroxidase                   |
| 80-6                                 | GRMZM2G405459     | 9.77 | 33.10    | 34.00           | 516.30             | 6                     | R.AGMAAAVQQEPR.M<br>K.SQVEAACPGTVSCADILALAAR.D<br>R.DGVNLLSGPTWAVQLGR.R<br>R.TASQSAANSNLPSPSSSAAALVSAFAS<br>K.G<br>R.DLVALSGAHTIGAAR.C<br>K.MGSIGPLTGSSGEIR.A                                                        | 43-54<br>108-129<br>130-146<br>151-178<br><br>184-198<br>300-314                                     | Peroxidase                   |
| 79-29/33                             | AC196475.3_FGP004 | 5.41 | 39.50    | 53.6            | 53.58              | 1                     | K.NAIELGLLEVLR.E                                                                                                                                                                                                     | 35-47                                                                                                | O-Methyltransferase          |
| 76-15                                | GRMZM2G149751-P02 | 6.31 | 49.70    | 8.10            | 138.32             | 3                     | K.FALESFWDGK.S<br>K.ALGVDTVPVLVGPVSYLLLSKPAK.G<br>K.YLFAGVVDGR.N                                                                                                                                                     | 19-28<br>146-169<br>288-297                                                                          | Putative methionine synthase |
| Cell wall salt extract proteins, BOA |                   |      |          |                 |                    |                       |                                                                                                                                                                                                                      |                                                                                                      |                              |
| Id-No. Protein                       | Accession No.     | pI:  | MW (kDa) | Seq. Coverage % | Mascot MS/MS Score | No. of MS/MS Peptides | MS/MS Peptide sequence                                                                                                                                                                                               | Range                                                                                                | Protein Identification       |
| 88-9                                 | GRMZM2G147687     | 7.12 | 66.90    | 3.5             | 178.14             | 2                     | R.IGEATALEVR.A<br>R.GFVISDWEGIDR.I                                                                                                                                                                                   | 184-193<br>336-347                                                                                   | Glycosyl hydrolase           |

|                    |                   |      |       |        |        |   |                                                                                                                                                                       |                                                                                    |                                  |
|--------------------|-------------------|------|-------|--------|--------|---|-----------------------------------------------------------------------------------------------------------------------------------------------------------------------|------------------------------------------------------------------------------------|----------------------------------|
| 89-12              | GRMZM2G118003     | 9.37 | 56.40 | 20.50  | 446.99 | 8 | K.GANWLGLSR.A<br>K.SLNFDAYR.F<br>R.FSISWSR.I<br>K.MADLFTDYADFCFK.T<br>R.IVALLGYDTGSNPPQR.C<br>R.CAAGGNSATEPYIVAHNFLLAHATAVAR.<br>K.FGIVYVDFNTLER.H<br>K.ASAYWFR.D     | 28-37<br>104-111<br>112-118<br>174-187<br>204-219<br>223-250<br>474-486<br>490-496 | β-Glucosidase                    |
| 93/92-10           | GRMZM2G076348-P01 | 6.34 | 28.60 | 15.20  | 210.26 | 5 | R.AYVSGAASSSR.A<br>R.AVVLASDVFGYEAPLLR.Q<br>K.AGYFVVVPDFLK.G<br>K.AAEDAKPLFAALK.K<br>K.IFQGVEHGFACR.Y                                                                 | 59-69<br>70-86<br>95-106<br>128-140<br>225-236                                     | Endo1,3;1,4 β-D-glucanase        |
| 92-24              | GRMZM2G004699     | 6.15 | 36.20 | 9.30   | 71.97  | 2 | K.STGTGFQTR.G<br>R.DLDAAQYR.R                                                                                                                                         | 63-71<br>255-265                                                                   | Xyloglucan-endo-transglycosylase |
| 93-13<br>94-11/12  | GRMZM2G096247     | 7.87 | 25.80 | 199.50 | 18.60  | 4 | R.VLTCLFEK.K<br>R.YVCTQFPNDGNK.S<br>K.SLYGSGALER.A<br>K.QVLDVYDEILSR. N                                                                                               | 19-26<br>75-86<br>87-96<br>148-159                                                 | Glutathione S-transferase        |
| 94-5<br>93-14/16   | GRMZM2G175134     | 9.01 | 21.40 | 191.79 | 15.40  | 3 | R.DLFGPGALER.A<br>K.LLDIYEQR.L<br>R.LGEEAFLAGGK.F                                                                                                                     | 27-36<br>110-117<br>118-128                                                        | Glutathione S-transferase        |
| 94-13/14           | GRMZM2G126763     | 7.86 | 20.20 | 125.42 | 12.40  | 2 | K.SLYGSGALER.A<br>K.QVLDVYDEILSK.N                                                                                                                                    | 38-47<br>99-110                                                                    | Glutathione S-transferase        |
| 95-12/13<br>96-20  | GRMZM2G119499     | 7.91 | 36.60 | 142.30 | 6.70   | 2 | K.QGNPYLIGTGALER.A<br>K.LLDIYEQR.L                                                                                                                                    | 106-119<br>217-224                                                                 | Glutathione S-transferase        |
| 96-28/29           | GRMZM2G055487     | 6.80 | 30.80 | 85.47  | 4.2    | 1 | R.TFDLGYYANVAK.R                                                                                                                                                      | 208-219                                                                            | Peroxidase                       |
| 88-15/17<br>91-15/ | GRMZM2G108207     | 6.25 | 37.50 | 611.1  | 27.6   | 8 | R.DIGIAAGLIR.I<br>K.VSCADITTLATR.D<br>R.DAVVASGGPFFEVLGR.R<br>R.SLDTADLVALSGAHTVGR.G<br>K.DASAAQVLDVR.T<br>R.TPNAFDNK.Y<br>R.TPNAFDNKYYFDLIAK.Q<br>R.FALNQAAFFDQFAR.S | 68-77<br>132-143<br>144-1160<br>193-210<br>244-254<br>255-270<br>293-306           | Peroxidase                       |

|               |               |       |       |        |       |   |                                                                                                                                                                                        |                                                                                             |            |
|---------------|---------------|-------|-------|--------|-------|---|----------------------------------------------------------------------------------------------------------------------------------------------------------------------------------------|---------------------------------------------------------------------------------------------|------------|
| 91-16<br>92-2 | GRMZM2G108219 | 5.61  | 38.70 | 556.51 | 31.30 | 8 | R.DIGIAAGLIR.I<br>R.AAVHAVCGPTVSCADITTLATR.D<br>R.DAVVASGGPFFEVPLGR.R<br>R.SLDKADLVALSGAHTVGR.G<br>K.CASDPSGNVVTQVLDVR.T<br>R.TPNAFDNK.Y<br>R.TPNAFDNKYYFDLIAK.Q<br>R.FALNQAAFFDQFAR.S | 71-80<br>125-146<br>147-163<br>196-213<br>244-260<br>261-268<br>261-276<br>299-312          | Peroxidase |
| 92-4          | GRMZM2G108123 | 9.48  | 36.60 | 468.13 | 29.10 | 7 | R.TAVQAALR.R<br>R.EIALAAGLLR.I<br>K.VHAACGPTVSCADVTALATR.A<br>R.AAVVASGGPSYPVPLGQR.D<br>R.DVADLVALSGAHTVGR.A<br>R.ADSQEDDFAR.Q<br>R.LQQLDVVTPDAFDNVYYK.N                               | 51-58<br>60-69<br>116-135<br>136-153<br>189-204<br>214-223<br>236-253                       | Peroxidase |
| 92-15/16      | GRMZM2G405459 | 9.77  | 33.10 | 219.27 | 17.10 | 3 | R.AGMAAAVQQEPR.M<br>R.TASQSAANSNLPSPSSSAAALVSAFASK.<br>G<br>R.DLVALSGAHTIGAAR.C                                                                                                        | 43-54<br>151-178<br><br>184-198                                                             | Peroxidase |
| 90-8<br>91-5  | GRMZM2G103342 | 9.66  | 38.00 | 604.27 | 27.30 | 9 | K.VPTLLSFLAK.I<br>K.FFAGQLYR.T<br>R.TPNAFDNKYYVDLLNR.E<br>K.YYVDLLNR.E<br>K.MGQVNVLTGSQGQVR.A<br>R.YPPLAPGLSFDFYK.K<br>R.QNVGLAAALIR.L<br>R.VVSCADIVALAAR.E<br>R.ESVALGGGPAYK.L        | 31-44<br>64-74<br>132-144<br>145-156<br>184-193<br>233-240<br>257-272<br>265-272<br>313-327 | Peroxidase |
| 91-8          | GRMZM2G025441 | 10.46 | 33.40 | 478.54 | 20.60 | 5 | K.AAVTAAVAQEAR.M<br>R.GFGVVDNIK.A<br>R.DSVVALGGPSWR.V<br>R.TDLVALSGAHTIGLAQCK.N<br>R.MGNISPLTGTQGQIR.R                                                                                 | 45-56<br>101-109<br>132-143<br>185-202<br>300-314                                           | Peroxidase |
| 91-12         | GRMZM2G089982 | 9.59  | 35.70 | 374.02 | 24.60 | 6 | K.EIVQSIVAQAVAK.E<br>R.GFEVIDQIK.A<br>K.AALEAACPGTVSCADIVALAAR.D<br>R.SGGDNNLFPLDFITPAK.F<br>K.GLLSSDEILLTK.S<br>K.SAETAALVK.A                                                         | 44-56<br>104-112<br>113-134<br>239-255<br>269-280<br>281-289                                | Peroxidase |

|                                        |               |      |       |        |       |   |                                                                                                                                                        |                                                                      |                                      |
|----------------------------------------|---------------|------|-------|--------|-------|---|--------------------------------------------------------------------------------------------------------------------------------------------------------|----------------------------------------------------------------------|--------------------------------------|
| 90-10/11<br>91-27/28                   | GRMZM2G085967 | 8.84 | 35.40 | 344.62 | 19.2  | 7 | K.AHIPHAPDVASTLLR.T<br>R.DSVGVIGGPFWSVPTGR.R<br>R.GFGFIDR.I<br>K.ECPGVVSCADIVALAAR.D<br>R.GGPDDADPSLDPLYAAK.L<br>R.TFDLSYYR.G<br>R.GLFQSDAALITDAASK.A  | 46-60<br>80-96<br>97-103<br>111-127<br>163-179<br>251-258<br>265-280 | Peroxidase                           |
| 91-27/29                               | GRMZM2G168073 | 5.50 | 27.40 | 117.37 | 15.00 | 2 | R.TLDFLPPPTSSLPELVQSFAAK.G<br>R.VLFTSDASLLTSPATAK.L                                                                                                    | 97-118<br>200-216                                                    | Peroxidase                           |
| 91-36/38                               | GRMZM2G070603 | 9.11 | 35.30 | 74.34  | 4.80  | 1 | R.GLFQSDAALLADATTR.E                                                                                                                                   | 270-285                                                              | Peroxidase                           |
| 88-17/19<br>90-9                       | GRMZM2G394500 | 6.20 | 31.50 | 376.34 | 25.10 | 5 | K.TAPINIGLAAFEVIDEIK.A<br>R.DLPDSTFTVSELIR.N<br>R.LSAPPAQIVPAYR.N<br>R.DFLDNSYYHNNLAR.I<br>R.IVTFNSDWQLLTEK.E                                          | 37-54<br>109-122<br>155-167<br>214-227<br>228-241                    | Peroxidase                           |
| 90-13<br>91-14/15<br>92-15/16<br>93-21 | GRMZM2G410175 | 6.20 | 35.00 | 326.71 | 20.10 | 6 | R.FYGGQSCPSVEDVVR.K<br>R.ALSVAPSLAGPLL.R.M<br>R.GFGFIER.V<br>K.GPFWAVPLGR.R<br>R.DTDPELDR.A<br>R.TFDLGYYANVAK.R                                        | 25-38<br>44-57<br>94-100<br>132-141<br>211-218<br>247-258            | Peroxidase                           |
| 89-15/16                               | GRMZM2G044049 | 9.08 | 39.60 | 65.66  | 3.50  | 1 | K.SDAALLTSTETAR.M                                                                                                                                      | 312-324                                                              | Peroxidase                           |
| 91-32/35<br>92-12/14<br>96-40/44       | GRMZM2G023840 | 9.84 | 36.60 | 327.54 | 31.10 | 6 | R.GFEVIDEIK.A<br>K.AALEAACPATVSCADILALAAR.D<br>K.LQGLDIVDLVALLGSHTIGDSR.C<br>R.SGGDQNLFFLDPVTPFK.F<br>R.GLLSSDEVLLTGSGATADLVK.L<br>K.LYAAANQDIFFQHAR.S | 113-121<br>122-143<br>191-212<br>248-264<br>278-298<br>299-313       | Peroxidase                           |
| 92-29/35                               | GRMZM2G054123 | 5.43 | 42.50 | 66.37  | 3.80  | 1 | R.FVIGGPHGDAGLTGR.K                                                                                                                                    | 240-254                                                              | S-adenosylmeth-<br>ionine synthetase |
